# Supplementary material for: Highly reproducible perovskite solar cells with excellent CH3NH3PbI3−xClx film morphology fabricated via high precursor concentration
Source: Royal Society of Chemistry journal article supplement (doi:10.1039/c6ra07359j), 2016-01-01
Supplement: c6ra07359j1.pdf [file c6ra07359j1.pdf]

## Supporting Information

### **Highly Reproducible Perovskite Solar Cells with Excellent $\text{CH}_3\text{NH}_3\text{PbI}_{3-x}\text{Cl}_x$ Films Morphology Fabricated via High Precursor Concentration**

*Dong Liu,<sup>a</sup> Cai Liu, <sup>\*a</sup> Lili Wu,<sup>a</sup> Wei Li,<sup>a</sup> Fang Chen,<sup>a</sup> Bangqing Xiao,<sup>a</sup> Jingquan Zhang, <sup>\*a</sup> Lianghuan Feng<sup>a</sup>*

<sup>a</sup>Institute of Solar Energy Materials and Devices, College of Materials Science and Engineering, Sichuan University, Chengdu, China, 610064.

#### **Corresponding Authors**

\*Tel & Fax: +86 (0)28 85412542

\*E-mail: liucaicn@foxmail.com

\*E-mail: [zhangjq@scu.edu.cn](mailto:zhangjq@scu.edu.cn)

| concentration | Thickness |
|---------------|-----------|
| 40wt%         | 287 nm    |
| 45wt%         | 311 nm    |
| 50wt%         | 335 nm    |

**Table S1.** The thickness of the corresponding perovskite layers prepared with different precursor solution concentration.

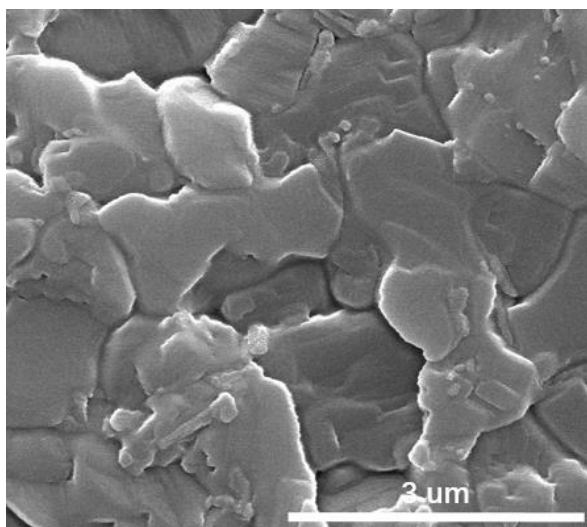

**Fig. S2** SEM images of the  $\text{CH}_3\text{NH}_3\text{PbI}_{3-x}\text{Cl}_x$  perovskite films prepared with 55 wt% concentration.

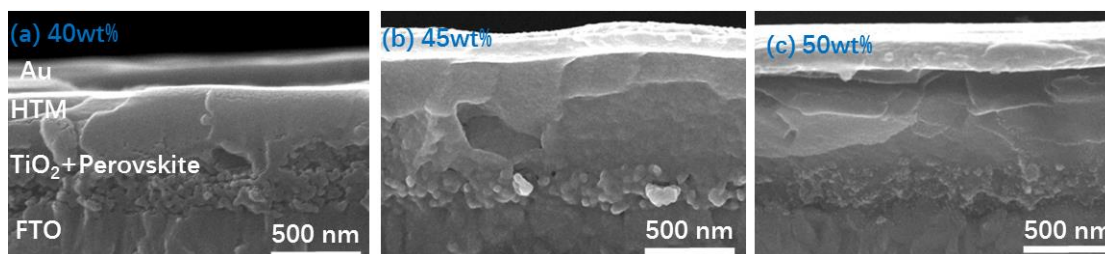

**Fig. S3** The cross-sectional SEM images of the devices consisting of FTO/bl-TiO<sub>2</sub>/mp-TiO<sub>2</sub>/perovskite/HTM/Au.

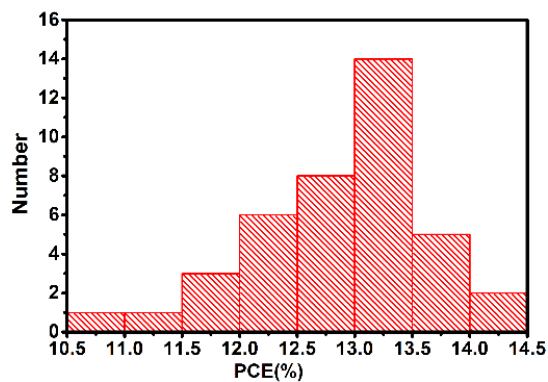

**Fig. S4** Histograms of device efficiency for 40 cells.

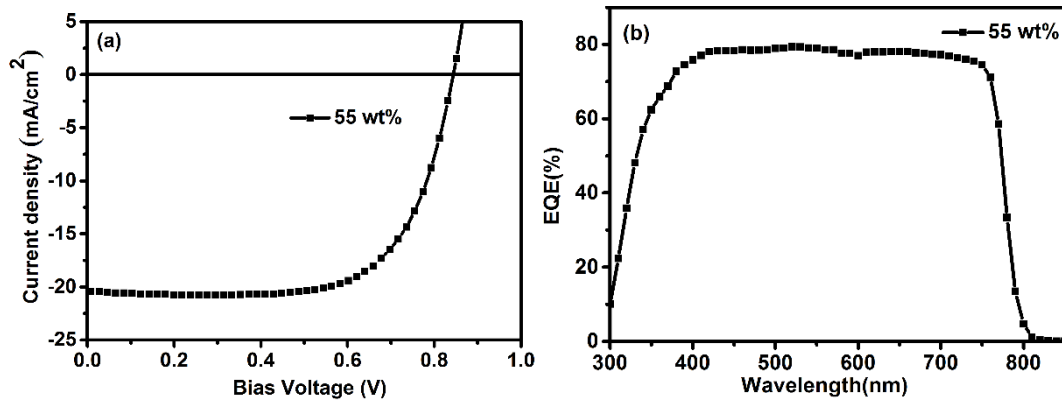

**Fig. S5** (a) J-V curve and (b) EQE spectra of the device fabricated with 55wt% concentration measured under AM1.5 simulated sun light.
